# Supplementary material for: Synthesis of a grape-like conductive carbon black/Ag hybrid as the conductive filler for soft silicone rubber
Source: Royal Society of Chemistry journal article supplement (doi:10.1039/d1ra08649a), 2022-01-01
Supplement: d1ra08649a1.pdf [file d1ra08649a1.pdf]

## Supplementary information

### Synthesis of grape-like conductive carbon black/Ag hybrid as the conductive filler for soft silicone rubber

Yanli Dou,<sup>a</sup> Haijing Gu,<sup>a</sup> Shixiang Sun,<sup>a</sup> Weiguo Yao<sup>a</sup> and Dongbo Guan<sup>\*a</sup>

<sup>a</sup> The ministry of education key laboratory of automotive material, College of Materials Science and Engineering, Jilin University, Changchun PR China, 130025.

E-mail: [guandb@jlu.edu.cn](mailto:guandb@jlu.edu.cn).

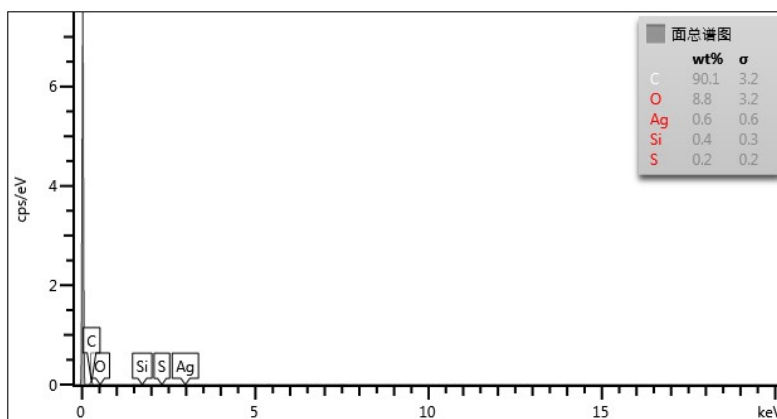

Fig. S1 The EDS spectra and elemental distribution of 6%SMCB@Ag/SR..

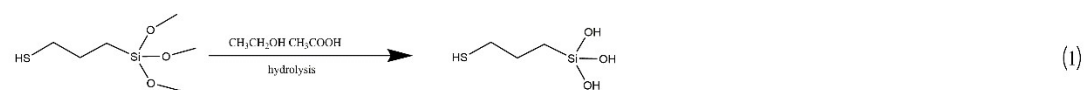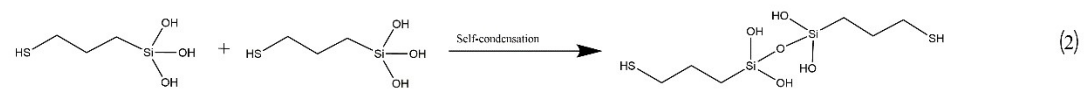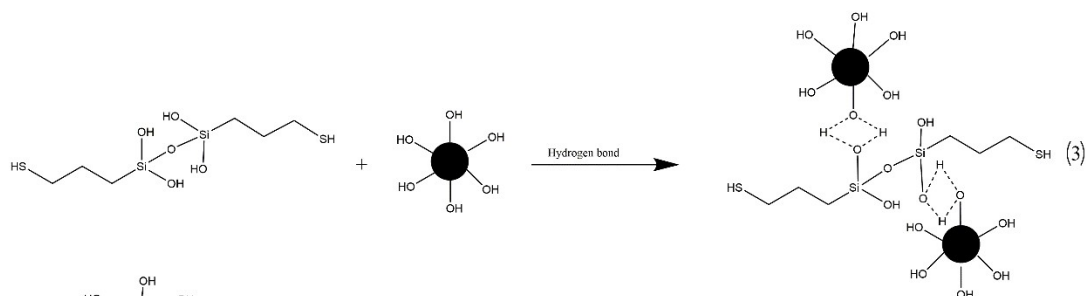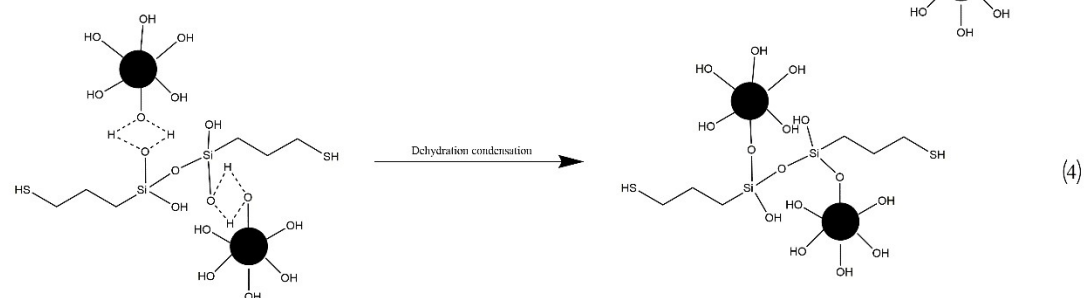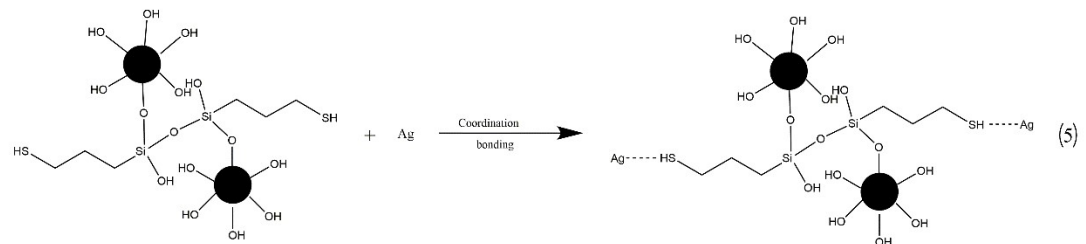

Fig. S2 Schematic of the reaction between each component.

Table S1 Summary of the performance of stretchable conductive composites.

| Filler           | Matrix     | Conductivity<br>(S/m) | Electrical properties                   | Application                  | Ref.      |
|------------------|------------|-----------------------|-----------------------------------------|------------------------------|-----------|
| MWCNT            | SR         | ~1                    | -                                       | -                            | 2         |
| MWCNT forest     | PU         | 50-100                | Almost constant for<br>strain up to 40% | -                            | 40        |
| MWCNT            | PDMS       | 10 <sup>-3</sup>      | Decrease with the strain                | -                            | 9         |
| CuNW-PVA         | PDMS       | 83                    | Almost stable within<br>60% strain      | -                            | 42        |
| Carbon fiber     | PDMS       | 20-40                 | Almost stable within<br>80% train       | Stretchable<br>interconnects | 41        |
| MWCNT-PDA-<br>Ag | SR<br>foam | 5                     | -                                       | Electromagnetic<br>shielding | 48        |
| SMCB@Ag          | SR         | 10                    | Stable within 100%<br>strain            | Stretchable<br>conductor     | This work |
